# Supplementary material for: Arsenite Inhibits Tissue-Type Plasminogen Activator Synthesis through NRF2 Activation in Cultured Human Vascular Endothelial EA.hy926 Cells
Source: MDPI journal article supplement (doi:10.3390/ijms22020739), 2021-01-13
Supplement: s1 [file s1]

# Arsenite inhibits tissue-type plasminogen activator synthesis through NRF2 activation in cultured human vascular endothelial EA.hy926 cells

Tsuyoshi Nakano, Tsutomu Takahashi, Chika Yamamoto, Eiko Yoshida, Toshiyuki Kaji and Yasuyuki Fujiwara

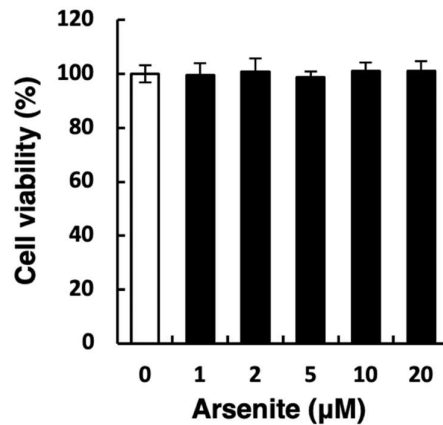

**Figure S1.** Cell viability of endothelial EA.hy926 cells after exposure to arsenite. Confluent cultures of endothelial EA.hy926 cells were incubated for 48 h with arsenite at 1, 2, 5, 10, or 20  $\mu\text{M}$ . The data are reported as the mean  $\pm$  S.D. of four samples. The data were analyzed using one-way ANOVA, followed by the Bonferroni/Dunn test.

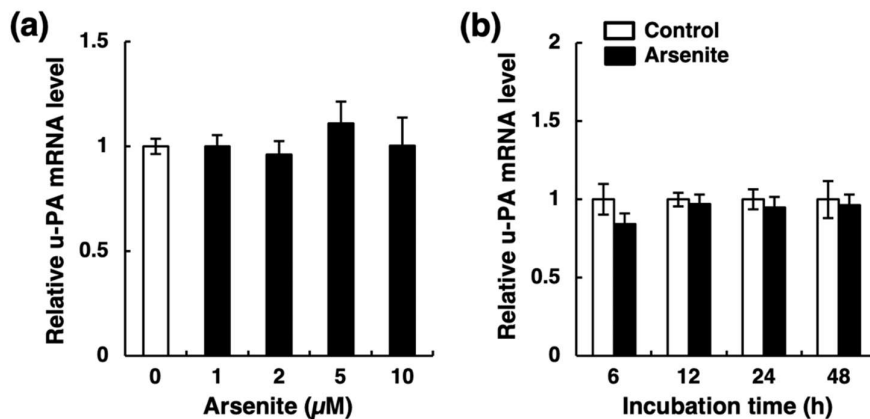

**Figure S2.** Effects of arsenite on the mRNA expression of u-PA in endothelial EA.hy926 cells. (a) The cells were incubated with arsenite at 1, 2, 5, or 10  $\mu\text{M}$  for 24 h. The data are reported as the mean  $\pm$  S.D. of three samples. The data were analyzed using one-way ANOVA, followed by the Bonferroni/Dunn test. (b) The cells were incubated with arsenite at 10  $\mu\text{M}$  for 6, 12, 24, or 48 h. The data are reported as the mean  $\pm$  S.D. of three samples. The data were analyzed using Student's *t*-test.

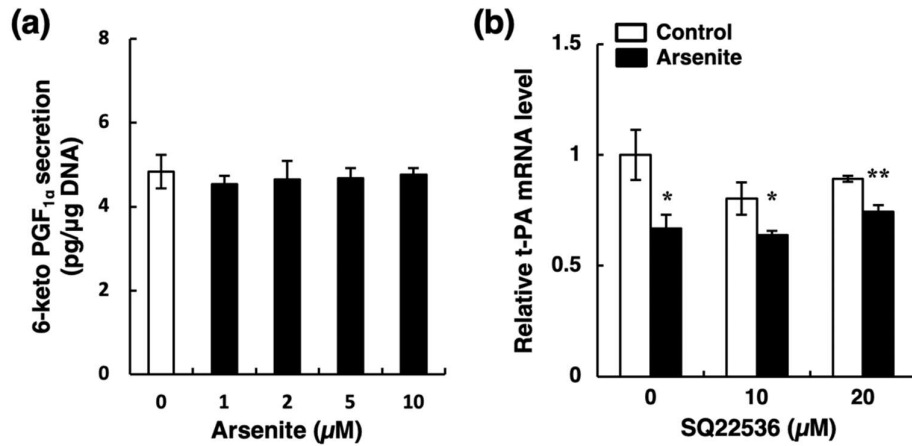

**Figure S3.** Possible involvement of the cyclic AMP pathway in the inhibition of t-PA mRNA expression by arsenite in endothelial EA.hy926 cells. (a) The release of PGI<sub>2</sub> from endothelial EA.hy926 cells into conditioned medium. The cells were incubated with arsenite at 1, 2, 5, or 10 μM for 24 h, and secreted PGI<sub>2</sub> was detected as 6-keto PGF<sub>1α</sub>. The data are reported as the mean ± S.D. of four samples. The data were analyzed using one-way ANOVA, followed by the Bonferroni/Dunn test. (b) Effect of SQ22536, an adenylate cyclase inhibitor, on arsenite-induced suppression of t-PA mRNA expression. The cells were incubated with arsenite at 10 μM for 24 h after pretreatment with SQ22536 for 3 h. The data are reported as the mean ± S.D. of three samples. The data were analyzed using Student's *t*-test. Significantly different from the corresponding control, \**p* < 0.05; \*\**p* < 0.01.
